# Supplementary material for: Colonic mucosa-associated diffusely adherent afaC+ Escherichia coli expressing lpfA and pks are increased in inflammatory bowel disease and colon cancer
Source: PubMed Central journal article supplement — Gut. 2013 Jul 11;63(5):761–70. doi: 10.1136/gutjnl-2013-304739 (PMC3995253; doi:10.1136/gutjnl-2013-304739), 2013-07-11
Supplement: gutjnl-2013-304739-s1.pdf [file gutjnl-2013-304739-s1.pdf]

**Colonic mucosa-associated Diffusely-Adherent *afaC*+ *Escherichia coli* expressing *lpfA* and *pks* are increased in inflammatory bowel disease and colon cancer.** Maelle Prorok-Hamon, Melissa K. Friswell, Abdullah Alswied, Fei Song, Carol L. Roberts, Paul Flanagan, Paul Knight, Caroline Codling, Julian R. Marchesi, Craig Winstanley, Neil Hall, Jonathan M. Rhodes and Barry J. Campbell.

**Supplementary file S1**

**Table S1(A) - Oligonucleotide primers used for RT-PCR and amplicon sizes**

| Gene                           | Oligonucleotide sequence (5'-3')                               | Amplicon size (bp)      | Reference or Genbank Accession N <sup>o</sup> . |
|--------------------------------|----------------------------------------------------------------|-------------------------|-------------------------------------------------|
| <i>afaC</i>                    | fp: CGGCTTTTCTGCTGAACTGGCAGGC<br>rp: CCGTCAGCCCCACGGCAGACC     | 672                     | 25                                              |
| <i>dsbA</i>                    | fp: CTGCCGGAAGGCGTGAAC<br>rp: GCTGTTCCACGCCGCGTC               | 237                     | 18                                              |
| <i>fimA</i>                    | fp: GCTGAATGATTGCGATACCA<br>rp: AGCACCGGTTGCAAATAAC            | 255                     | 16                                              |
| <i>fimC</i>                    | fp: AAAAACGTCAATGTAAGGAAATCG<br>rp: GCACCATAATCATTATTGTTCCGG   | 682                     | <b>FJ866045</b>                                 |
| <i>fimH</i>                    | fp: TGCAGAACGGATAAGCCGTGG<br>rp: GCAGTCACCTGCCCTCCGGTA         | 508                     | 5                                               |
| <i>fliC</i>                    | fp: ATGGCACAAGTCATTAAT<br>rp: TTAACCCTGCAGTAGAGA               | Full gene<br>1497bp K12 | a                                               |
| <i>htrA</i>                    | fp: TTCCAGCAGTTCTTCGGTGA<br>rp: ATCAGTTCGCCGTTTCAGGTT          | 530                     | <b>M36536</b>                                   |
| <i>lpfA<sub>Shigella</sub></i> | fp: AGGCGGTGCATTCACTCTGGCATCT<br>rp: CCGCGTCGATAGCGGTATAGGCAGA | 448                     | <b>NC_004337</b>                                |
| <i>lpfA<sub>LF82</sub></i>     | fp: CTGAAAACCTGCGATATCTCC<br>rp: GGCCTTCTTTCAGACGGTA           | 199                     | 19                                              |
| <i>ompC</i>                    | fp: GCGCCGACATCAACGTATTT<br>rp: GCCAACAAGCGCAGAACTT            | 141                     | b                                               |
| <i>papC</i>                    | fp: GACGGCTGTACTGCAGGGTGTGGCG<br>rp: ATATCCTTTCTGCAGGGATGCAATA | 328                     | 5                                               |
| <i>pks</i>                     | fp: AGCCGTATCCTGCTCAAAAC<br>rp: TCGGTATGTCCGGTTAAAGC           | 1413                    | 22                                              |

<sup>a</sup> Subramanian S *et al.* (2008). Characterization of epithelial IL-8 response to inflammatory bowel disease mucosal *E. coli* and its inhibition by mesalamine. *Inflamm. Bowel Dis.* 14: 162–175

<sup>b</sup> Balaji B *et al.* (2005). Timing of induction of osmotically controlled genes in *Salmonella enterica* Serovar Typhimurium, determined with quantitative real-time reverse transcription-PCR. *Appl. Environ. Microbiol.* 71: 8273-83

**Colonic mucosa-associated Diffusely-Adherent *afaC*<sup>+</sup> *Escherichia coli* expressing *lpfA* and *pks* are increased in inflammatory bowel disease and colon cancer.**

Maelle Prorok-Hamon, Melissa K. Friswell, Abdullah Alswied, Fei Song, Carol L. Roberts, Paul Flanagan, Paul Knight, Caroline Codling, Julian R. Marchesi, Craig Winstanley, Neil Hall, Jonathan M. Rhodes and Barry J. Campbell.

**Methods S1(A): PCR amplification conditions**

*E. coli*, grown overnight on LB agar, were re-suspended in 100µL sterile water, boiled for 5 min and centrifuged (13,000 g, 10 min). Aliquots of supernatant (2µL) were used as amplification template in 50µL reactions containing 45µl 1.1X ReddyMix<sup>TM</sup> PCR Mastermix (Thermofisher; Loughborough, UK) with 300nM of forward and reverse.

All amplifications were performed in a thermal cycler (Hybaid Omnigene; Middlesex, UK) and carried out using conditions described within references listed in Table S1 or as follows:

*afaC* - amplification of was carried out over 25 cycles (94°C for 1 min, 65°C for 1 min and 72°C for 2 min).

*htrA* - amplification was carried out over 35 cycles (95°C for 1 min, 55°C for 1 min, and 72°C for 2 min).

*dsbA* - additional MgCl<sub>2</sub> was added to a final concentration of 3.4 mM.

*lpfA<sub>Shigella</sub>* - amplification over 35 cycles (94°C for 1 min, 60°C for 1 min, and 72°C for 1 min).

All PCR-generated cDNA products were applied to 2% (wt/vol) agarose gel containing 1:10K Gelred nucleic acid gel stain and electrophoresed for ~1 h at 100V.

**Colonic mucosa-associated Diffusely-Adherent *afaC*<sup>+</sup> *Escherichia coli* expressing *lpfA* and *pks* are increased in inflammatory bowel disease and colon cancer.** Maelle Prorok-Hamon, Melissa K. Friswell, Abdullah Alswied, Fei Song, Carol L. Roberts, Paul Flanagan, Paul Knight, Caroline Codling, Julian R. Marchesi, Craig Winstanley, Neil Hall, Jonathan M. Rhodes and Barry J. Campbell.

**Table S1(B): Oligonucleotide primers and probes used for qPCR**

| Gene       | Human Universal Probe Library Set (Roche) | Oligonucleotide sequence (5'-3')                     |
|------------|-------------------------------------------|------------------------------------------------------|
| beta-Actin | #64                                       | fp: CCAACCGCGAGAAGATGA<br>rp: CCAGAGGCGTACAGGGATAG   |
| VEGF-A     | #29                                       | fp: CCTTGCTGCTCTACCTCCAC<br>rp: CCACTTCGTGATGATTCTGC |
