# Supplementary material for: Colonic mucosa-associated diffusely adherent afaC+ Escherichia coli expressing lpfA and pks are increased in inflammatory bowel disease and colon cancer
Source: PubMed Central journal article supplement — Gut. 2013 Jul 11;63(5):761–70. doi: 10.1136/gutjnl-2013-304739 (PMC3995253; doi:10.1136/gutjnl-2013-304739), 2013-07-11
Supplement: gutjnl-2013-304739-s4.pdf [file gutjnl-2013-304739-s4.pdf]

**Supplementary file S4**

**Table S4: *E. coli* uptake and replication of fosmid library clones within J774-A1 murine macrophages**

| Strain                               | Uptake of bacteria <sup>a</sup><br>CFU/wells x10 <sup>4</sup> | Fold replication<br>6h/3h <sup>b</sup> | Fold replication<br>24h/3h <sup>b</sup> |
|--------------------------------------|---------------------------------------------------------------|----------------------------------------|-----------------------------------------|
| HM358                                | 5.36± 1.1                                                     | 17.66± 3.80 <sup>c</sup>               | 11.26± 2.67 <sup>c</sup>                |
| <b>HA+ (<i>afaC</i><sup>+</sup>)</b> |                                                               |                                        |                                         |
| 1a12                                 | 5.14± 2.3                                                     | 2.37± 0.51                             | 0.77± 0.19                              |
| 2f4                                  | 5.52± 3.8                                                     | 1.94± 0.40                             | 0.19± 0.03                              |
| 2f9                                  | 6.43± 2.7                                                     | 1.84± 0.18                             | 0.23± 0.05                              |
| 3b9                                  | 3.99± 2.3                                                     | 1.53± 0.28                             | 0.20± 0.01                              |
| 4b6                                  | 6.26± 2.8                                                     | 1.89± 0.09                             | 0.49± 0.06                              |
| 4g9                                  | 10.86± 1.5                                                    | 2.29± 0.51                             | 1.54± 0.25                              |
| 8h8                                  | 5.08± 2.7                                                     | 1.19± 0.08                             | 0.51± 0.28                              |
| 9b12                                 | 7.75± 3.4                                                     | 1.62± 0.05                             | 0.14± 0.01                              |
| <b>HA- (<i>afaC</i><sup>-</sup>)</b> |                                                               |                                        |                                         |
| 1c2                                  | 7.75± 3.4                                                     | 1.81± 0.15                             | 0.92± 0.10                              |
| 3h5                                  | 2.38± 1.0                                                     | 2.3± 0.48                              | 1.18± 0.01                              |
| 4c11                                 | 6.45± 2.7                                                     | 2.15± 0.35                             | 2.63± 0.60                              |
| 5b9                                  | 5.62± 4.1                                                     | 1.69± 0.31                             | 0.18± 0.008                             |
| 7c11                                 | 7.76± 6.6                                                     | 1.66± 0.39                             | 0.24± 0.05                              |
| 8d8                                  | 6.29± 3.09                                                    | 2.19± 0.16                             | 0.44± 0.11                              |
| 9b7                                  | 4.73± 2.0                                                     | 1.61± 0.26                             | 0.23± 0.06                              |

**Haemagglutinin positive (HA+) and negative (HA-) library clones**

**Data expressed as means ± SEM, determined from N=2-7 independent experiments, with each experiment performed with n=2-3 replicates.**

<sup>a</sup> CFU recovered from lysed macrophages after 3h (2h infection followed by 1h gentamicin treatment)

<sup>b</sup> recovered intracellular bacteria from lysed macrophages after 6h or 24h, relative to intracellular numbers at 3h

**Statistical analysis was performed using Mann-Whitney U with Bonferroni correction.**

<sup>c</sup> significantly different from EPI300<sup>TM</sup>-T1<sup>R</sup>/pCC1FOS<sup>TM</sup>; p<0.0001.

**Colonic mucosa-associated Diffusely-Adherent *afaC*<sup>+</sup> *Escherichia coli* expressing *lpfA* and *pks* are increased in inflammatory bowel disease and colon cancer.** Maelle Prorok-Hamon, Melissa K. Friswell, Abdullah Alswied, Fei Song, Carol L. Roberts, Paul Flanagan, Paul Knight, Caroline Codling, Julian R. Marchesi, Craig Winstanley, Neil Hall, Jonathan M. Rhodes and Barry J. Campbell.

#### Methods S4: Assessment of TNF $\alpha$ release from macrophages.

Macrophages were infected with *E. coli*, library clones or *E. coli* constructs in antibiotic-free media for 2h, at MOI 10. Media was removed, macrophages washed and replaced with media containing 20 $\mu$ g/mL gentamicin. Followed 4h incubation, supernatant was collected and assayed using a commercial mouse TNF $\alpha$  Quantikine<sup>®</sup> ELISA (SMTA00: R&D systems, Abingdon; UK).

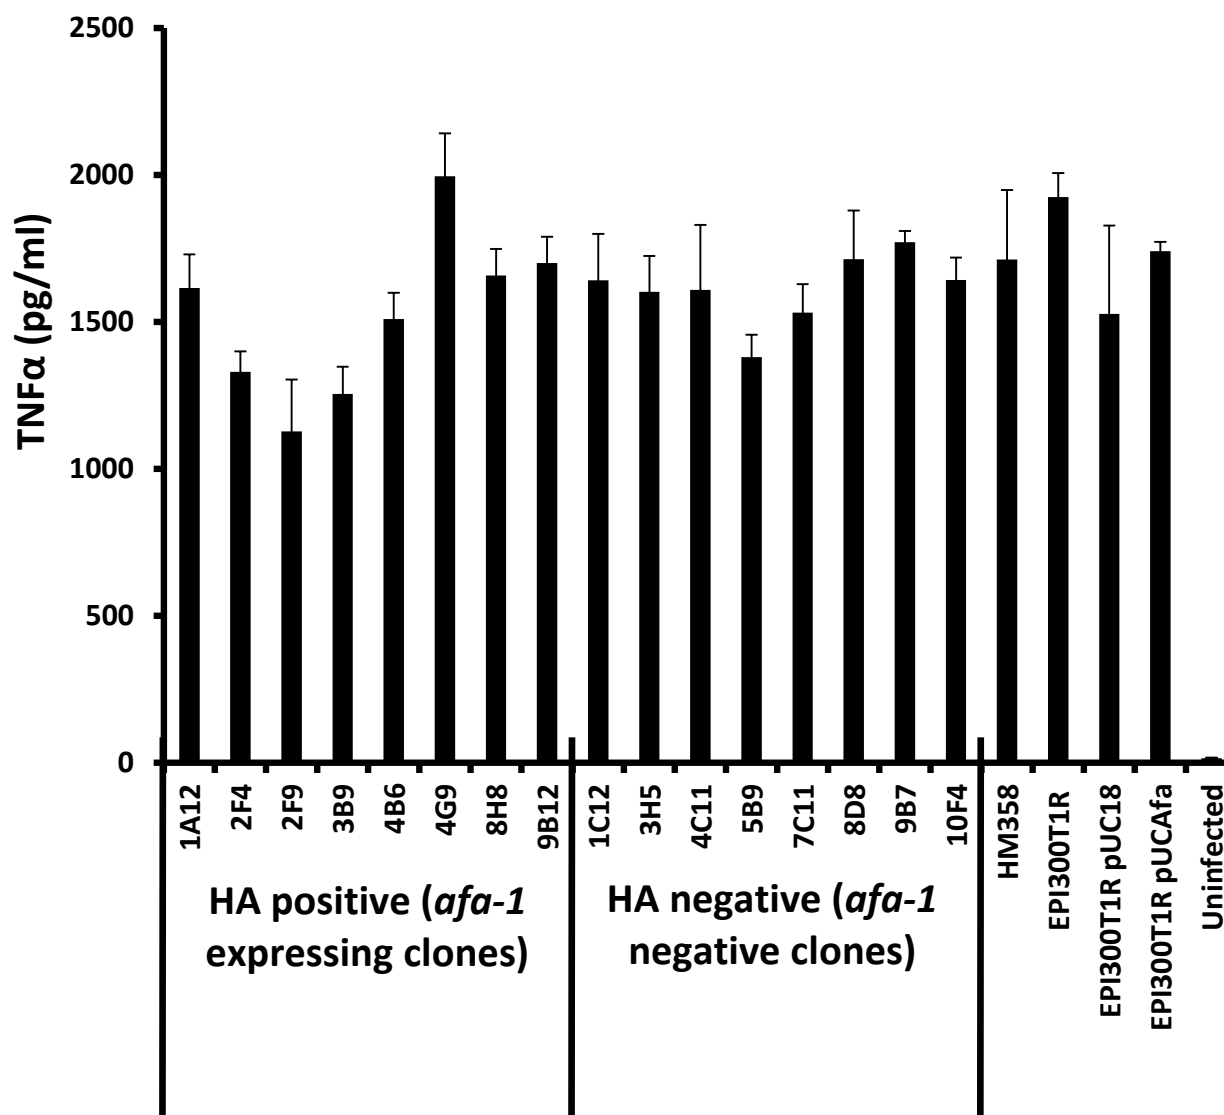

**Figure S4: TNF $\alpha$  release from macrophages by *afa-1* positive clones, wild type *E. coli* HM358 and *E. coli* expressing the full *afa-1* operon.** Murine J774.A1 macrophages were infected with *E. coli* for 2h, at MOI 10. The 8 HA positive fosmid library clones possessing the *afa-1* gene cluster, exhibiting no significant ability above HA negative clones to release TNF $\alpha$  to culture supernatant (6h post-infection) as assessed by ELISA. Similar TNF $\alpha$  levels were released by the wild-type strain HM358 and *E. coli* EPI300<sup>TM</sup>-T1<sup>R</sup>/pCC1FOS<sup>TM</sup> expressing Afa-1 from pUCAfa. Results are presented as mean  $\pm$  SEM (n=4 for clones; n=3 for other *E. coli*).
