# Supplementary material for: Colonic mucosa-associated diffusely adherent afaC+ Escherichia coli expressing lpfA and pks are increased in inflammatory bowel disease and colon cancer
Source: PubMed Central journal article supplement — Gut. 2013 Jul 11;63(5):761–70. doi: 10.1136/gutjnl-2013-304739 (PMC3995253; doi:10.1136/gutjnl-2013-304739), 2013-07-11

## Colonic mucosa-associated Diffusely-Adherent *afaC*<sup>+</sup> *Escherichia coli* expressing *lpfA* and *pks* are increased in inflammatory bowel disease and colon cancer.

Maele Prorok-Hamon, Melissa K. Friswell, Abdullah Alswied, Fei Song, Carol L. Roberts, Paul Flanagan, Paul Knight, Caroline Codling, Julian R. Marchesi, Craig Winstanley, Neil Hall, Jonathan M. Rhodes and Barry J. Campbell.

### Supplementary file S5

**FIGURE S5: Presence of Afa-1 does not confer ability of mucosa-associated *E. coli* to translocate through M-cells.** (A) Colonic mucosa-associated *E. coli* isolate HM358 (possessing *lpfA* and *afa* operons) translocated through M-cell monolayers more readily than through Caco2-c11 monolayers. (B) Little or no translocation was seen for transformed *E. coli* EPI300<sup>TM</sup>T1<sup>R</sup> containing the *afa-1* operon (pUCAfa) nor the vector control strain containing pUC18 alone. Translocation is expressed relative to M-cell translocation of HM358 through Caco2-c11 monolayers (mean  $\pm$  SEM); N=2 separate experiments, with n=3-7 replicates. \*\*\*, P<0.001; Kruskal-Wallis.

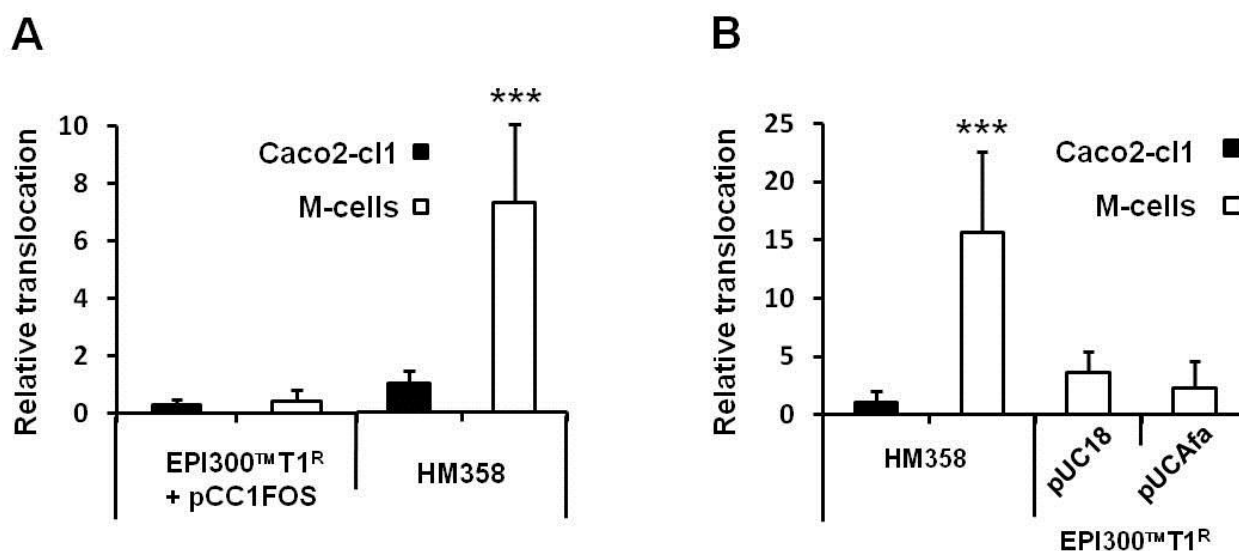

Supplement: gutjnl-2013-304739-s5.pdf [file gutjnl-2013-304739-s5.pdf]
