# Supplementary material for: Colonic mucosa-associated diffusely adherent afaC+ Escherichia coli expressing lpfA and pks are increased in inflammatory bowel disease and colon cancer
Source: PubMed Central journal article supplement — Gut. 2013 Jul 11;63(5):761–70. doi: 10.1136/gutjnl-2013-304739 (PMC3995253; doi:10.1136/gutjnl-2013-304739), 2013-07-11
Supplement: gutjnl-2013-304739-s6.pdf [file gutjnl-2013-304739-s6.pdf]

**Colonic mucosa-associated Diffusely-Adherent *afaC*<sup>+</sup> *Escherichia coli* expressing *lpfA* and *pks* are increased in inflammatory bowel disease and colon cancer.**

Maele Prorok-Hamon, Melissa K. Friswell, Abdullah Alswied, Fei Song, Carol L. Roberts, Paul Flanagan, Paul Knight, Caroline Codling, Julian R. Marchesi, Craig Winstanley, Neil Hall, Jonathan M. Rhodes and Barry J. Campbell.

**Supplementary file S6**

**Table A: Prevalence of *lpfA* expressing *E. coli* observed in patients with Crohn's disease, colitis and colon cancer compared with controls (using total number of patients as the denominator).\***

|                    | <i>lpfA</i> <sup>+</sup> | Total | <i>P</i> value <sup>#</sup> |
|--------------------|--------------------------|-------|-----------------------------|
| Crohn's disease    | 9                        | 14    | NS                          |
| Colorectal cancer  | 20                       | 21    | <0.0001                     |
| Ulcerative colitis | 9                        | 21    | NS                          |
| Controls           | 8                        | 24    |                             |

\* Presence or absence of *lpfA* (either *lpfA*<sub>Shigella</sub> or *lpfA*<sub>LF82</sub>) is based on PCR assay.

<sup>#</sup> *P* values obtained using Fishers exact test (2P component).

**Table B: Presence of *lpfA* in *E. coli* isolated from patients with Crohn's disease, colitis and colon cancer compared with controls (using total number of *E. coli* as the denominator).\***

|                    | <i>lpfA</i> <sup>+</sup> | <i>lpfA</i> <sup>-</sup> | <i>P</i> value <sup>#</sup> |
|--------------------|--------------------------|--------------------------|-----------------------------|
| Crohn's disease    | 57                       | 19                       | <0.0001                     |
| Colorectal cancer  | 74                       | 53                       | 0.0144                      |
| Ulcerative colitis | 27                       | 26                       | NS                          |
| Controls           | 16                       | 29                       |                             |

\* Presence or absence of *lpfA* (either *lpfA*<sub>Shigella</sub> or *lpfA*<sub>LF82</sub>) is based on PCR assay.

<sup>#</sup> *P* values obtained using Chi<sup>2</sup> test (Yates-corrected).
